# Supplementary material
Source: Springer Nature journal article supplement (https://www.springerprofessional.de/resource/supplementary/40192_2012_2_MOESM5_ESM.pdf/11899466)
Supplement: MOESM5 [file 11899466]

• Risk\* associated with ICME use can be related to:

- Model complexity
- Supporting data
- Verification and Validation

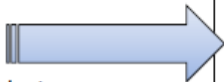

Ideally captured by : ICME Tool Maturity Level.

(\*Risk of significant error or failure of ICME methods or models)

• Consequences associated with ICME use can be related to:

- Specific application
- Location in TRL or IPD process, if applicable
- Impact on product or system

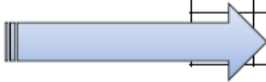

|                          |           |                                                    |                                                                 |   |   |                                                                  |
|--------------------------|-----------|----------------------------------------------------|-----------------------------------------------------------------|---|---|------------------------------------------------------------------|
| Likelihood of Occurrence | 5<br>>70% |                                                    |                                                                 |   |   |                                                                  |
|                          | 4<br>>50% |                                                    | Medium Risk – Aggressively manage; consider alternative process |   |   | High Risk - Implement new process(es) or change baseline plan(s) |
|                          | 3<br>>30% |                                                    |                                                                 |   |   |                                                                  |
|                          | 2<br>>1%  |                                                    |                                                                 |   |   |                                                                  |
|                          | 1<br><1%  |                                                    | Low Risk – Monitor.                                             |   |   |                                                                  |
|                          |           | 1                                                  | 2                                                               | 3 | 4 | 5                                                                |
|                          |           | <b>Consequences (Increasing severity &gt;&gt;)</b> |                                                                 |   |   |                                                                  |

Consequences vs. Likelihood 5X5 Risk Matrix

Ref: "Guidelines for Preparing Project Risk Management Plans," New Millennium Program, NASA, NMP-GL-07, June 7, 2005.
